# Supplementary material for: Strategy for an early simultaneous introduction of four-pillars of heart failure therapy: results from a single center experience
Source: PubMed Central journal article supplement — Am J Cardiovasc Drugs. 2024 Jun 23;24(5):663–71. doi: 10.1007/s40256-024-00660-6 (PMC11344711; doi:10.1007/s40256-024-00660-6), 2024-06-23
Supplement: 40256_2024_660_MOESM1_ESM.pdf [file 40256_2024_660_MOESM1_ESM.pdf]

## Supplementary Information

### *American Journal of Cardiovascular Drugs*

## Strategy for an early simultaneous introduction of four-pillars of heart failure therapy: results from a single center experience

Paolo Severino<sup>1†\*</sup>, Andrea D'Amato<sup>1†</sup>, Silvia Prosperi<sup>1</sup>, Marco Valerio Mariani<sup>1</sup>, Vincenzo Myftari<sup>1</sup>, Aurora Labbro Francia<sup>1</sup>, Claudia Cestiè<sup>1</sup>, Elisa Tomarelli<sup>1</sup>, Giovanna Manzi<sup>1</sup>, Lucia Ilaria Birtolo<sup>1</sup>, Stefanie Marek-Iannucci<sup>1</sup>, Viviana Maestrini<sup>1</sup>, Massimo Mancone<sup>1</sup>, Roberto Badagliacca<sup>1</sup>, Francesco Fedele<sup>1</sup>, Carmine Dario Vizza<sup>1</sup>.

<sup>1</sup> Department of Clinical, Internal, Anesthesiology and Cardiovascular Sciences, Sapienza University of Rome, Viale del Policlinico 155, 00161 Rome, Italy.

† These Authors contributed equally

\* Corresponding Author: Email [paolo.severino@uniroma1.it](mailto:paolo.severino@uniroma1.it)

**Table S1.** Baseline features of the total population and each group before the propensity score matching (PMS) analysis at hospital admission.

| Parameter                        | Overall population (N=320) | Group 1 (N= 139) | Group 2 (N=181) | p-value |
|----------------------------------|----------------------------|------------------|-----------------|---------|
| Age, years (SD)                  | 71.3 (±10.9)               | 69.7 (±13.2)     | 73 (±11.7)      | 0.01    |
| Male gender, n (%)               | 87 (27)                    | 29 (20.9)        | 58 (32.3)       | 0.03    |
| Arterial hypertension, n (%)     | 263 (82)                   | 111 (79.9)       | 152 (84)        | 0.38    |
| Type II diabetes mellitus, n (%) | 60 (18.7)                  | 22 (15.9)        | 38 (21)         | 0.25    |
| Dyslipidemia, n (%)              | 160 (50)                   | 58 (41.7)        | 102 (56.5)      | 0.013   |
| CVD family history, n (%)        | 106 (33)                   | 34 (24.5)        | 72 (40)         | 0.004   |
| Smoking habit, n (%)             | 95 (30)                    | 47 (33.8)        | 48 (26.7)       | 0.17    |
| eGFR, ml/min (SD)                | 60.4 (±24.1)               | 62.2 (±24)       | 58.4 (±23.5)    | 0.15    |
| LVEDD, mm (SD)                   | 55.6 (±7.5)                | 58 (±4.2)        | 51.8 (±7.2)     | < 0.001 |
| IVS, mm (SD)                     | 11.1 (±1.7)                | 11 (±1.1)        | 11.3 (±1.7)     | 0.07    |
| PW, mm (SD)                      | 10.2 (±1.2)                | 10 (±1.3)        | 10.5 (±1.4)     | 0.001   |
| LVEF, % (SD)                     | 33.1 (±10.2)               | 31.1 (± 9.9)     | 35.3 (±12.7)    | 0.001   |

CVD cardiovascular disease, eGFR estimated glomerular filtration rate, Hb hemoglobin, LVEDD left ventricular end diastolic diameter, IVS interventricular septum, PW posterior wall, LVEF left ventricle ejection fraction, NYHA New York Heart Association.
